# Supplementary material for: Brief communication: On the potential of seismic polarity reversal to identify a thin low-velocity layer above a high-velocity layer in ice-rich rock glaciers
Source: Copernicus journal article supplement (doi:10.5194/tc-18-3231-2024), 2024-07-16
Supplement: Supplementary file 1 [file tc-18-3231-2024-supplement.pdf]

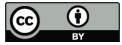

*Supplement of*

**Brief communication: On the potential of seismic polarity reversal to identify a thin low-velocity layer above a high-velocity layer in ice-rich rock glaciers**

**Jacopo Boaga et al.**

*Correspondence to:* Jacopo Boaga ([jacopo.boaga@unipd.it](mailto:jacopo.boaga@unipd.it))

The copyright of individual parts of the supplement might differ from the article licence.

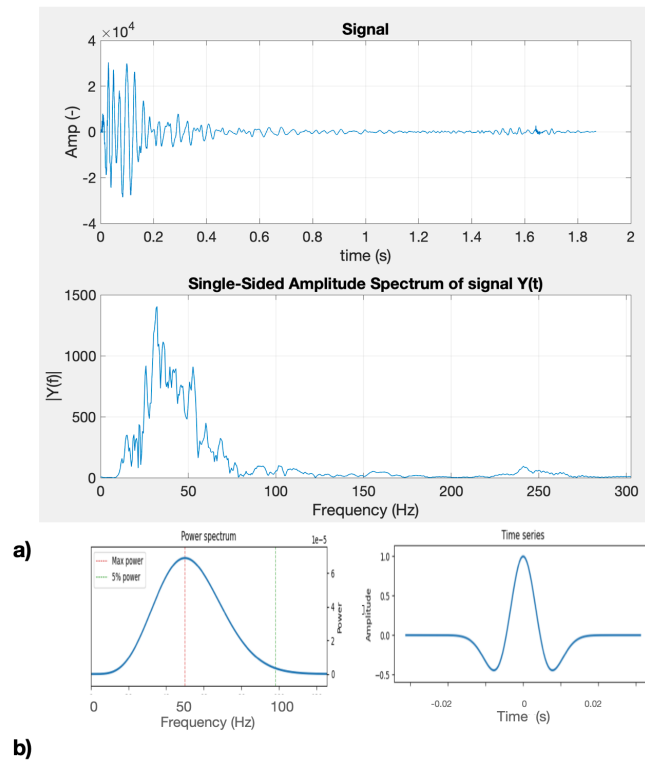

Fig. S1 a) experimental recordings of 1 shot at Schafberg site with 20kg sledgehammer, time and frequency domain; b) Ricker wavelet adopted for synthetic modelling centred at 50 Hz.

## S1. Technical info for SRT / ERT processing

### Flüelapass site

#### ➤ ERT Acquisition

Syscal Pro- device, 48 channels, 2 m spacing, Dipole-Dipole skip 0-3, stacking range 3-6 (5% standard deviation threshold), and direct and reciprocal measurements.

#### ➤ ERT inversion modelling ResIPy

#### Filtering

- $\rho_a < 0$
- stacking error < 5%
- reciprocal error < 10% (1050/1901)

#### Inversion modelling

- Inversion type: regularized inversion with linear filtering;
- Regularization mode: normal regularization;
- Data type: logarithmic;
- Expected data error: 10% (a\_wgt = 0.01, b\_wgt = 0.10);
- Flux type: 3D;
- Weights update: routine based on Morelli and LaBrecque (1996);
- smoothing factor: normal isotropic regularisation (= 1);
- Iteration: 2;
- Final RMS misfit: 1;

Expected data error evaluated with the reciprocal check. We defined a boundary threshold for the reciprocal error that allowed for a reliable quality of the measured apparent resistivities but at the same time a homogeneous distribution of measured points in the pseudo-section.

We applied an isotropic smoothing since we were interested in highlighting both lateral and vertical variations of resistivity.

➤ SRT acquisition

Geode seismographs, 48 channels, 100 Hz geophones, 2 m geophones spacing, 4 meters shots spacing, 2 shots in each position, 20 kg hammer as seismic source.

➤ SRT inversion modelling Pygimli

Inversion modelling:

- Picking error: 2 ms
- smoothing factor: normal isotropic regularisation (= 1);
- Regularization factor  $\lambda$ : 150;
- Starting model: gradient model 300-3000 m/s;
- Iteration: 4;
- Abort criteria reached:  $d\Phi = 1.26$  (< 2.0%);
- $rms/rms(data, Response) = 0.00489155/14.2038\%$ ;
- $\chi^2(data, Response, error, log) = 5.48181$ ;

Picking error: we evaluated the data uncertainty by performing a repeated picking of P-wave first arrivals for several shot gathered, calculating this way a representative standard deviation of 2 ms.

Regularization factor: we chose  $\lambda$  values using the L-curve analysis.

We applied an isotropic smoothing since we were interested in highlighting both lateral and vertical variations of Vp.

### Schafberg site

➤ ERT Acquisition

Syscal Pro- device, 48 channels, 3 m spacing, Dipole-Dipole skip 0-3, stacking range 3-6 (5% standard deviation threshold), and direct and reciprocal measurements.

➤ ERT inversion modelling ResIPy

Filtering

- $\rho_a < 0$
- stacking error < 5%
- reciprocal error < 20% (saved 1029/1901)

Inversion modelling

- Inversion type: regularized inversion with linear filtering;
- Regularization mode: normal regularization;
- Data type: logarithmic;
- Expected data error: 20% ( $a\_wgt = 0.01$ ,  $b\_wgt = 0.20$ );
- Flux type: 3D;
- Weights update: routine based on Morelli and LaBrecque (1996);
- smoothing factor: normal isotropic regularisation (= 1);
- Iteration: 2;
- Final RMS misfit: 1.17

Expected data error evaluated with the reciprocal check. We defined a boundary threshold for the reciprocal error that allowed for a reliable quality of the measured apparent resistivities but at the same time a homogeneous distribution of measured points in the pseudo-section.

We applied an isotropic smoothing since we were interested in highlighting both lateral and vertical variations of resistivity.

➤ SRT acquisition

Geode seismographs, 48 channels, 100 Hz geophones, 3 m geophones spacing, 4 meters shots spacing, 2 shots in each position, 20 kg hammer as seismic source.

➤ SRT inversion modelling Pygimli

Inversion modelling:

- Picking error: 2 ms
- smoothing factor: normal isotropic regularisation (= 1);
- Regularization factor  $\lambda$ : 200;
- Starting model: gradient model 500-5000 m/s;
- Iteration: 4;
- Abort criteria reached:  $d\Phi = 0.42$  (< 2.0%)
- $rms/rms(data, Response) = 0.00309603/17.893\%$
- $\chi^2(data, Response, error, log) = 2.39635$ ;

Picking error: we evaluated the data uncertainty by performing a repeated picking of P-wave first arrivals for several shot gathered, calculating this way a representative standard deviation of 2 ms.

Regularization factor: we chose  $\lambda$  values using the L-curve analysis.

We applied an isotropic smoothing since we were interested in highlighting both lateral and vertical variations of Vp.
